# Supplementary material for: Functional and morphological analysis of different aminoglycoside treatment regimens inducing hearing loss in mice
Source: PubMed Central journal article supplement — Exp Ther Med. 2019 Jun 18;18(2):1123–30. doi: 10.3892/etm.2019.7687 (PMC6601143; doi:10.3892/etm.2019.7687), 2019-06-18
Supplement: Supplementary_Data.pdf [file Supplementary_Data.pdf]

Figure S1. Method of hearing assessment in mice using (A and B) ABR and (C and D) DPOAE. DPOAE, distortion product otoacoustic emissions; ABR, auditory brainstem responses.

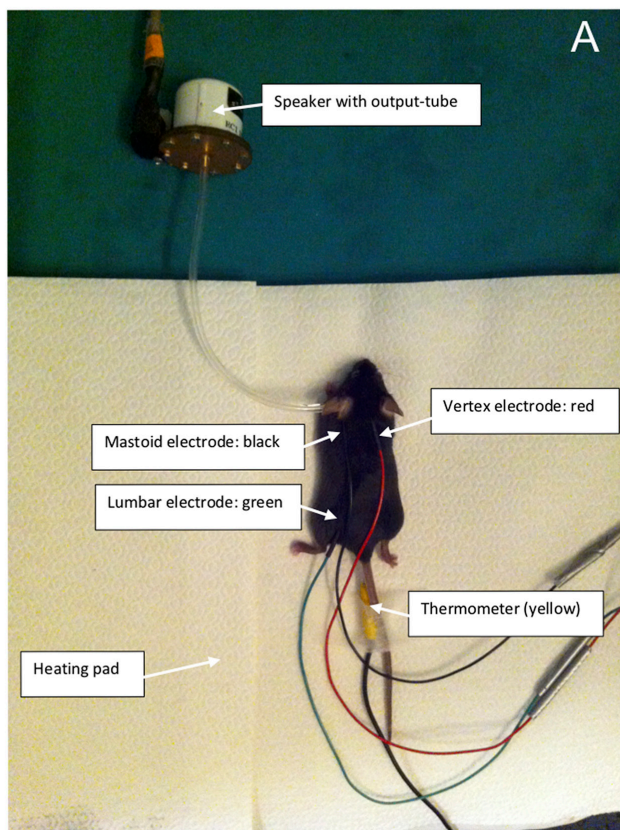

Image A.  
Anesthetized mouse on a heating pad, being assessed by ABR on the left ear in a soundproof chamber. The mouse's body temperature is being monitored by a rectal thermometer.

Needle electrodes is inserted subcutaneously at the vertex (active electrode), in the ipsilateral mastoid region (reference electrode) and in the lumbar region (ground electrode).

Speaker with output-tube is placed into the testing ear canal.

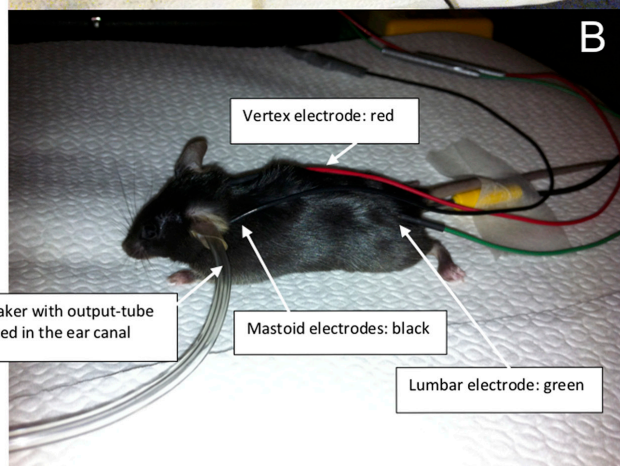

Image B.  
Lateral view of the mouse.
